# Supplementary material
Source: Springer Nature journal article supplement (https://www.springermedizin.de/resource/supplementary/12963_2011_153_MOESM11_ESM.pdf/9572772)

# Chance-Corrected Concordance Comparison

## Adult module, including health care experience information

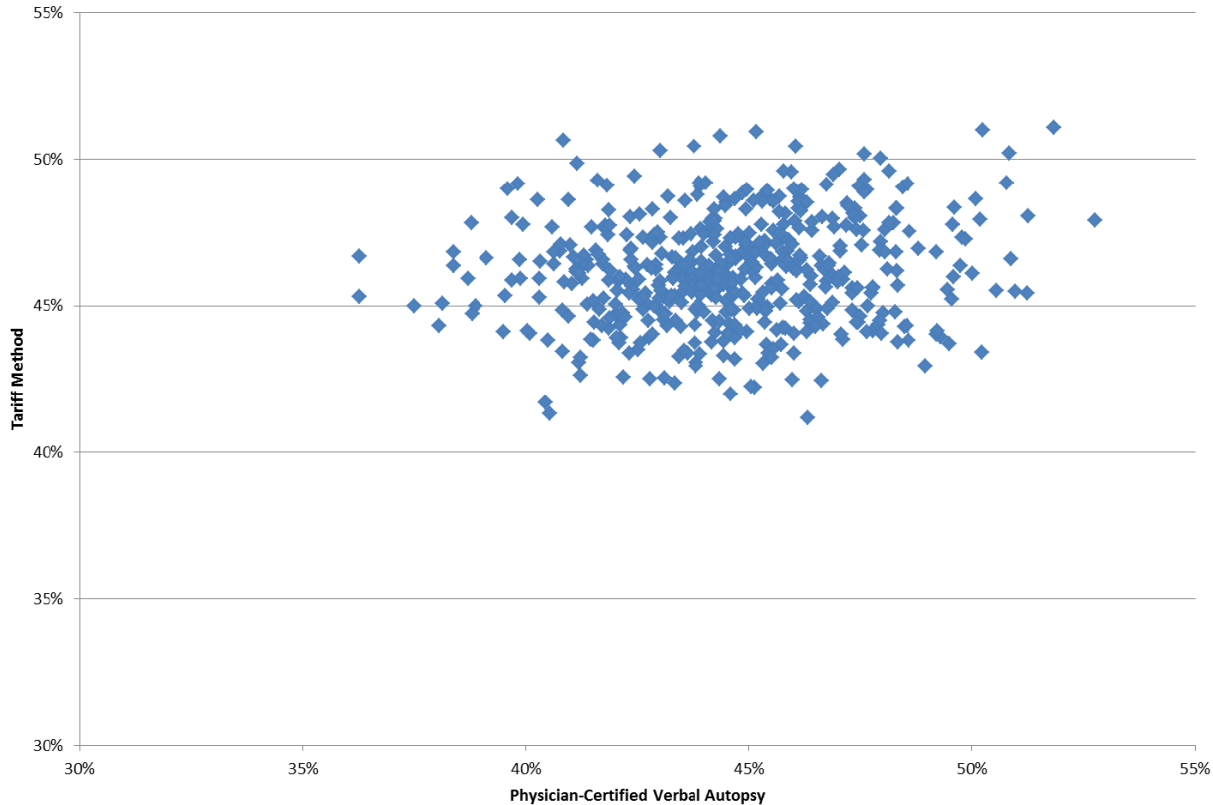

Supplement: MOESM11 [file 9572772]
